# Supplementary material
Source: Springer Nature journal article supplement (https://www.springermedizin.de/resource/supplementary/13019_2009_227_MOESM1_ESM.pdf/9638116)

MRIN.

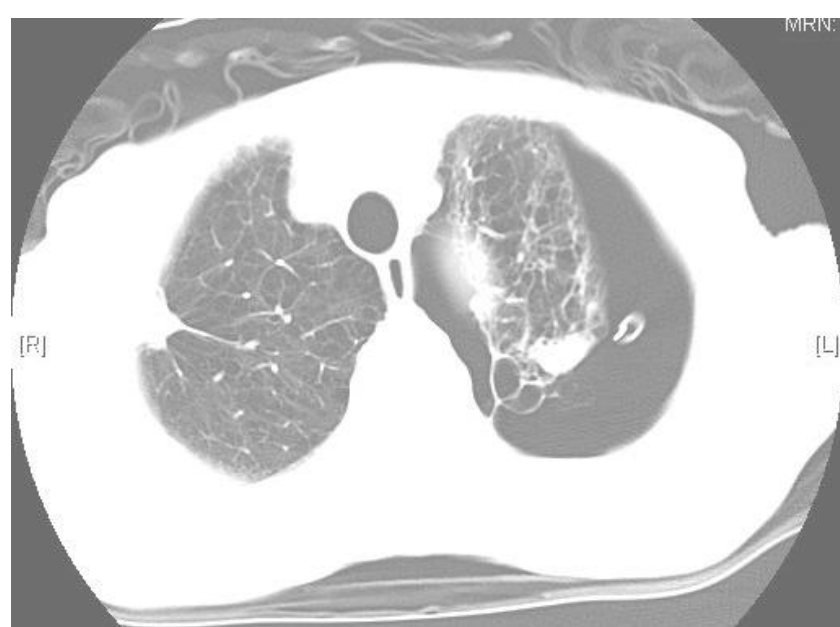

R

Erect

Portable

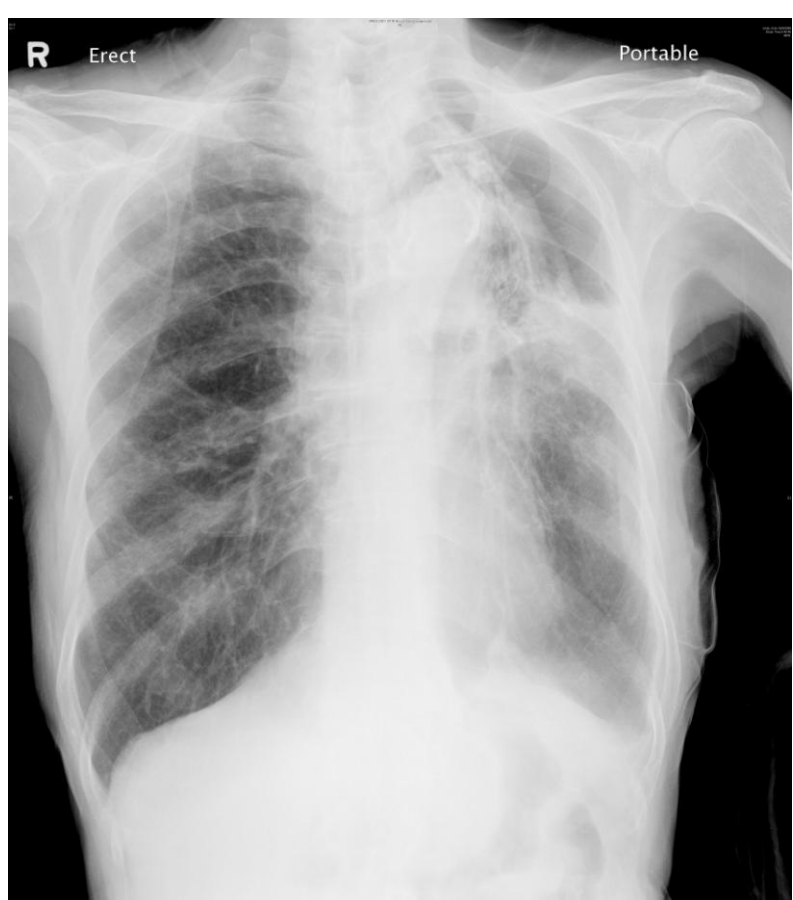

Supplement: MOESM1 [file 9638116]
